# Supplementary material for: The Essential Role of H2S-ABA Crosstalk in Maize Thermotolerance through the ROS-Scavenging System
Source: MDPI journal article supplement (doi:10.3390/ijms241512264), 2023-07-31
Supplement: s1 [file s1]

Table S1. Primers name, entry number, and primer sequence used in this paper

| Gene            | Accession Number | Primer sequence (5'—3')                                     |
|-----------------|------------------|-------------------------------------------------------------|
| <i>ZmTUB</i>    | NM_001111988.    | F: AGAACTGCGACTGCCTCCAAAGG<br>R: AGATGAGCAGGGTGCCCATTC      |
| <i>ZmLCD1</i>   | NM_001138259.    | F: AAGTGTTGAGGAAGGACAAGAG<br>R: GGCATCTCTCAAGACCTCATAC      |
| <i>ZmOAS-TL</i> | NM_001366967.    | F: GGCAAGTACCTCAAGGAGAAA<br>R: CTACTCCGTTTCCAGTGATGAG       |
| <i>ZmZEP</i>    | NM_001305856     | F: CCAGCGTAAATTTTCGTGAGATG<br>R: TGCTGCTCTAGTCTGGTAATTC     |
| <i>ZmNCED1</i>  | XM_008646423     | F: CGACTCCACCTCTCTCTATAA<br>R: GCGTGATCGAGTGGGTTATT         |
| <i>ZmAAO</i>    | NM_001177021     | F: TCAAGGTCTTGACGGACGTG<br>R: CCCGTACCATCTTCCTTCGG          |
| <i>ZmTUB</i>    | NM_001111988.    | F: AGAACTGCGACTGCCTCCAAAGG<br>R: AGATGAGCAGGGTGCCCATTC      |
| <i>ZmCAT1</i>   | NM_001254879.2   | F: GGGTCCAGACACCTGTTATTG<br>R: AGTTACCCTCTCTGGTGTAGAA       |
| <i>ZmSOD4</i>   | NM_001112234.2   | F: CGTCACCAGCAGGCTAGAAT<br>R: AGCCAACAGTCCAACACAGT          |
| <i>ZmGR1</i>    | NM_001305818.1   | F:CTCTCACGAGTTTGAAGAGTCTCGTGG<br>R:CCAGCGCAGCATCCGAATCTATAA |
| <i>ZmAPX1</i>   | NM_001370758.1   | F:GATCTTGTGGCTGCAGCATG<br>R:GGTGGACTCGAATTGCAGGA            |
| <i>ZmMDHAR</i>  | NM_001196274.1   | F:AAGTGGTGGAGAGAAGCTATTG<br>R:CTAGTCAGAGTCTTGGTGGAAG        |
| <i>ZmDHAR1</i>  | NM_001147572.1   | F:ATCTCTGGTCACTCCTGTAGAA<br>R:CTCGGAACCATCACTAGCATC         |
